# Supplementary material for: Crystal engineering towards highly ordered polymeric structures of 1,3-dithiole-2-thione–dihalogen adducts †
Source: Royal Society of Chemistry journal article supplement (doi:10.1039/b005570k), 2000-01-01
Supplement: b005570k.doc [file b005570k.doc]

Figure 2a

Figure 2b
